# Supplementary material for: Inulin with different degrees of polymerization protects against diet-induced endotoxemia and inflammation in association with gut microbiota regulation in mice
Source: PubMed Central journal article supplement (PMC6976630; doi:10.1038/s41598-020-58048-w), 2020-01-22
Supplement: 41598_2020_58048_MOESM1_ESM.pdf [file 41598_2020_58048_MOESM1_ESM.pdf]

1 **Supplementary information**

2 **Inulin with different degrees of polymerization protects against diet-induced**  
3 **endotoxemia and inflammation in association with gut microbiota regulation in**  
4 **mice**

5 **Li-Li Li<sup>1,3</sup>, Yu-Ting Wang<sup>1,2,3</sup>, Li-Meng Zhu<sup>1,3</sup>, Zheng-Yi Liu<sup>1,3</sup>, Chang-Qing Ye<sup>2,\*</sup> & Song**  
6 **Qin<sup>1,3,\*</sup>**

7 <sup>1</sup>Yantai Institute of Coastal Zone Research, Chinese Academy of Sciences, Yantai, 264003, China.

8 <sup>2</sup>School of Public Health, Nantong University, Nantong, 226019, China. <sup>3</sup>Center for Ocean

9 Mega-Science, Chinese Academy of Sciences, Qingdao, 266071, China. Correspondence and requests

10 for materials should be addressed to C.-Q.Y (email: [cqye@ntu.edu.cn](mailto:cqye@ntu.edu.cn)) or S.Q. (email: [sqin@yic.ac.cn](mailto:sqin@yic.ac.cn)).

11 \*Corresponding authors.

12 **Supplementary Table S1.** Primers used in this study

| Primers        | Forward primer                 | Reverse primer                  |
|----------------|--------------------------------|---------------------------------|
| TLR4           | 5'-GGGCCTAAACCCAGTCTGTTG -3'   | 5'-CTTCTGCCCGTAAGGTCCA-3'       |
| IL6            | 5'-CCACTTCACAAGTCGGAGGCTTA -3' | 5'-CCAGTTTGGTAGCATCCATCATTTC-3' |
| IL1 $\beta$    | 5'-TCCAGGATGAGGACATGAGCAC -3'  | 5'-GAACGTCACACACCAGCAGGTTA -3'  |
| CD11c          | 5'-ACGTCAGTACAAGGAGATGTTGGA -  | 5'-ATCCTATTGCAGAATGCTTCTTTACC3' |
| IKK $\epsilon$ | 5'-GGAGTGTGTGCAGACGTATCAGG -3' | 5'-AATGAGATGCAGGTGGTTCTGG -3'   |
| Gapdh          | 5'-TGTGTCCGTCGTGGATCTGA -3'    | 5'-TTGCTGTTGAAGTCGCAGGAG -3'    |

13

14

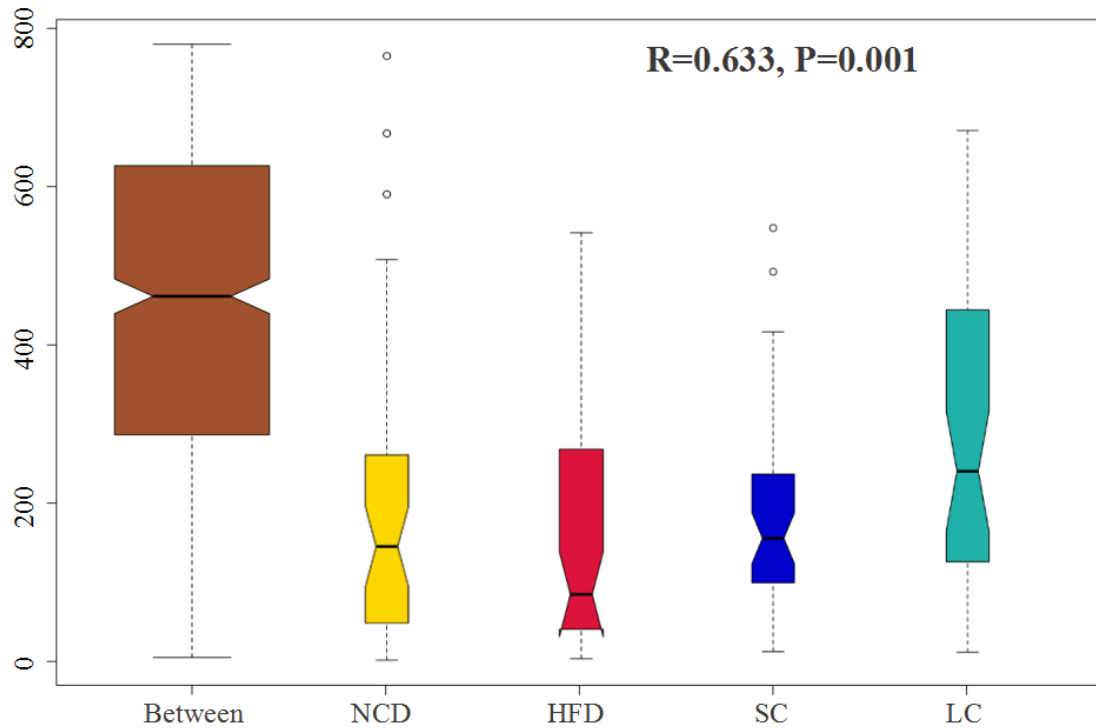

16 **Supplementary Figure S1.** One-way ANOSIM analysis of the difference in separation among four  
 17 groups. NCD, normal chow diet; HFD, high-fat diet; SC, high-fat diet plus short-chain inulin; LC,  
 18 high-fat diet plus long-chain inulin.  $R > 0$  indicated the difference between the extra-groups was  
 19 greater than the intra-groups.  $p < 0.05$  was considered to be statistically significant.

20

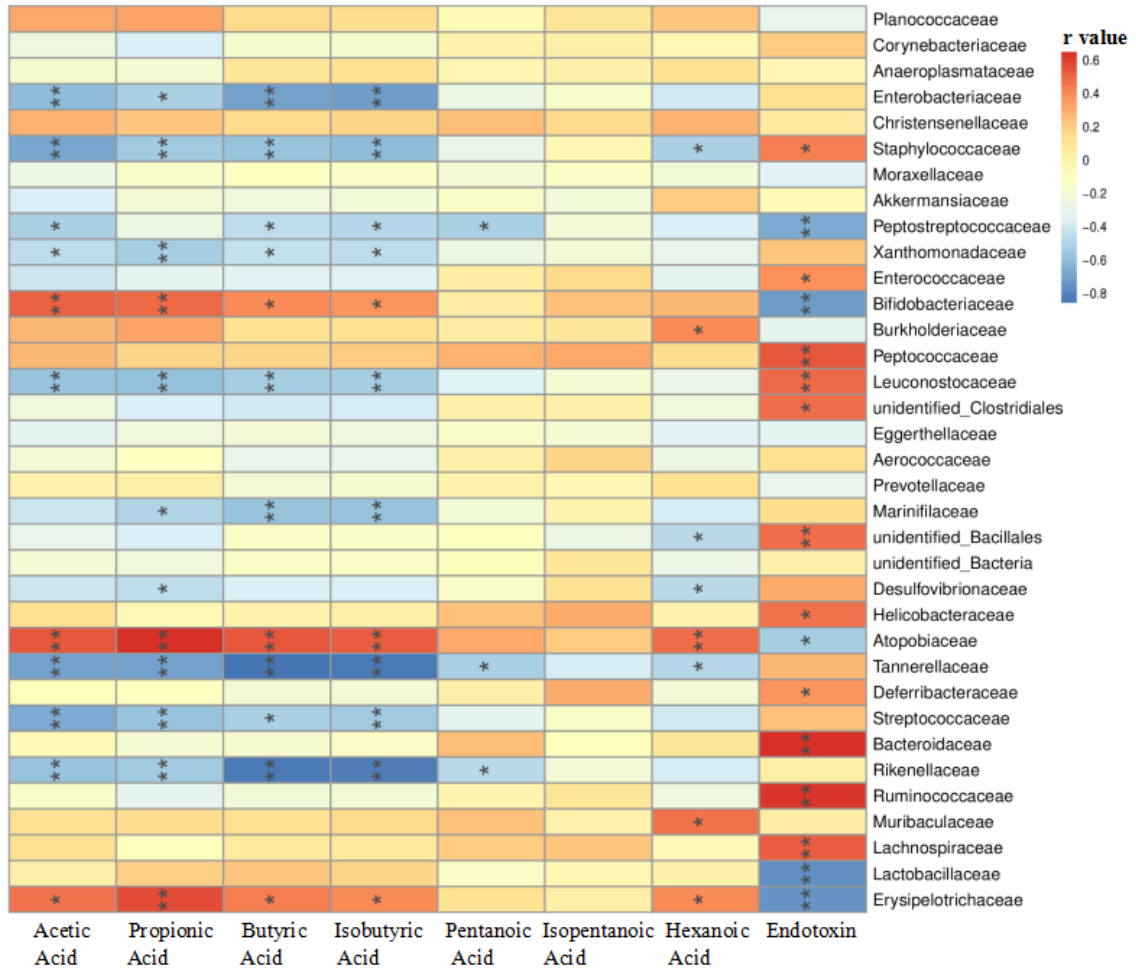

21

22 **Supplementary Figure S2.** Spearman correlations between levels of metabolites/component and

23 abundance of gut microbial families (n = 10). Cells marked with asterisk depict significance, \*  $p < 0.05$ ,

24 \*\*  $p < 0.01$ .
